# Supplementary material for: Repeated human deciduous tooth-derived dental pulp cell reprogramming factor transfection yields multipotent intermediate cells with enhanced iPS cell formation capability
Source: PubMed Central journal article supplement (PMC6365514; doi:10.1038/s41598-018-37291-2), 2019-02-06
Supplement: 41598_2018_37291_MOESM1_ESM.pdf [file 41598_2018_37291_MOESM1_ESM.pdf]

Title: Repeated human deciduous tooth-derived dental pulp cell reprogramming factor transfection yields multipotent intermediate cells with enhanced iPS cell formation capability

Authors: Miki Soda<sup>1</sup>, Issei Saitoh<sup>1,\*</sup>, Tomoya Murakami<sup>1</sup>, Emi Inada<sup>2</sup>, Yoko Iwase<sup>1</sup>, Hirofumi Noguchi<sup>3</sup>, Shinji Shibasaki<sup>4</sup>, Mie Kurosawa<sup>1</sup>, Tadashi Sawami<sup>1</sup>, Miho Terunuma<sup>5</sup>, Naoko Kubota<sup>2</sup>, Yutaka Terao<sup>6</sup>, Hayato Ohshima<sup>7</sup>, Haruaki Hayasaki<sup>1</sup> & Masahiro Sato<sup>8</sup>

Affiliations: <sup>1</sup> Division of Pediatric Dentistry, Graduate School of Medical and Dental Science, Niigata University, Niigata, Japan.

<sup>2</sup> Department of Pediatric Dentistry, Kagoshima University Graduate School of Medical and Dental Sciences, Kagoshima, Japan.

<sup>3</sup> Department of Regenerative Medicine, Graduate School of Medicine, University of the Ryukyus, Okinawa, Japan.

<sup>4</sup> Faculty of Dentistry, Niigata University, Niigata, Japan.

<sup>5</sup> Department of Oral Biochemistry, Graduate School of Medical and Dental Sciences, Niigata University, Niigata, Japan.

<sup>6</sup> Division of Microbiology and Infectious Diseases, Graduate School of Medical and Dental Sciences, Niigata University, Niigata, Japan.

<sup>7</sup> Division of Anatomy and Biology of the Hard Tissue, Graduate School of Medical and Dental Sciences, Niigata University, Niigata, Japan.

<sup>8</sup> Section of Gene Expression Regulation, Frontier Science Research Center, Kagoshima University, Kagoshima, Japan.

\*Corresponding Author: Issei Saitoh, D.D.S., Ph. D.

Division of Pediatric Dentistry

Graduate School of Medical and Dental Science, Niigata University

2-5274 Gakkocho-dori, Chuo-ku, Niigata 951-8514, Japan

Tel: +81 – 25 – 227 – 2911; Fax: +81 – 25 – 227 – 6911

E-mail: [isaito@dent.niigata-u.ac.jp](mailto:isaito@dent.niigata-u.ac.jp)

## Supplementary Figure Legends:

**Figure S1:** (i) Typical iPSC morphology of the HDDPC-derived iPSC colony derived from one of 12 lines generated after quadruple transfections. (ii), (iii) Morphology of the HDDPC-derived iPSCs derived from the other two of 12 lines generated after quadruple transfections. These two lines failed to show typical iPSC morphology. Bar = 500  $\mu\text{m}$ .

**Figure S2:** RT-PCR analysis of mRNA expression for endogenous *OCT3/4* and *SOX2*. Lanes ① Primary HDDPCs, ② HDDPCs after the single transfection, ③ HDDPCs after the double transfection, ④ HDDPCs after the triple transfection, ⑤ no template control (designated as –RT), and ⑥ iPSCs established from HDDPCs in our laboratory<sup>11</sup> (used as positive control). PCR primers are listed in Supplementary Table 1. M, 100-bp ladder markers.

**Figure S3:** RT-PCR analysis of mRNA expression for endogenous *NANOG* and *KLF4*. Lanes ① Primary HDDPCs, ② HDDPCs after the single transfection, ③ HDDPCs after the double transfection, ④ HDDPCs after the triple transfection, ⑤ no template control (designated as –RT), and ⑥ iPSCs established from HDDPCs in our laboratory<sup>11</sup> (used as positive control). PCR primers are listed in Supplementary Table 1. M, 100-bp ladder markers.

**Figure S4:** RT-PCR analysis of mRNA expression for endogenous *TNSALP* and *GAPDH*. Lanes ① Primary HDDPCs, ② HDDPCs after the single transfection, ③ HDDPCs after the double transfection, ④ HDDPCs after the triple transfection, ⑤ no template control (designated as –RT), and ⑥ iPSCs established from HDDPCs in our laboratory<sup>11</sup> (used as positive control). PCR primers are listed in Supplementary Table 1. M, 100-bp ladder markers.

## Supplementary Table Legend:

**Table S1:** Primer sets used for RT-PCR analysis.

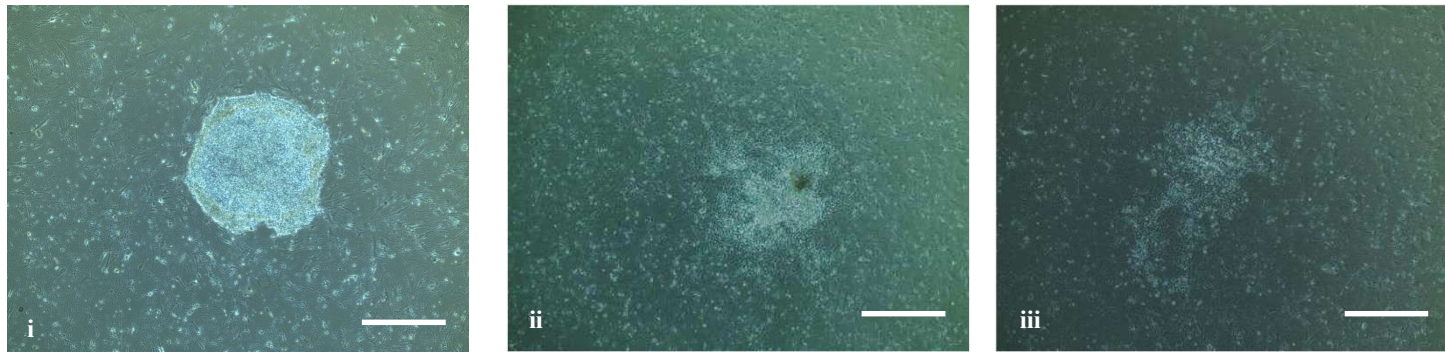

Figure S1

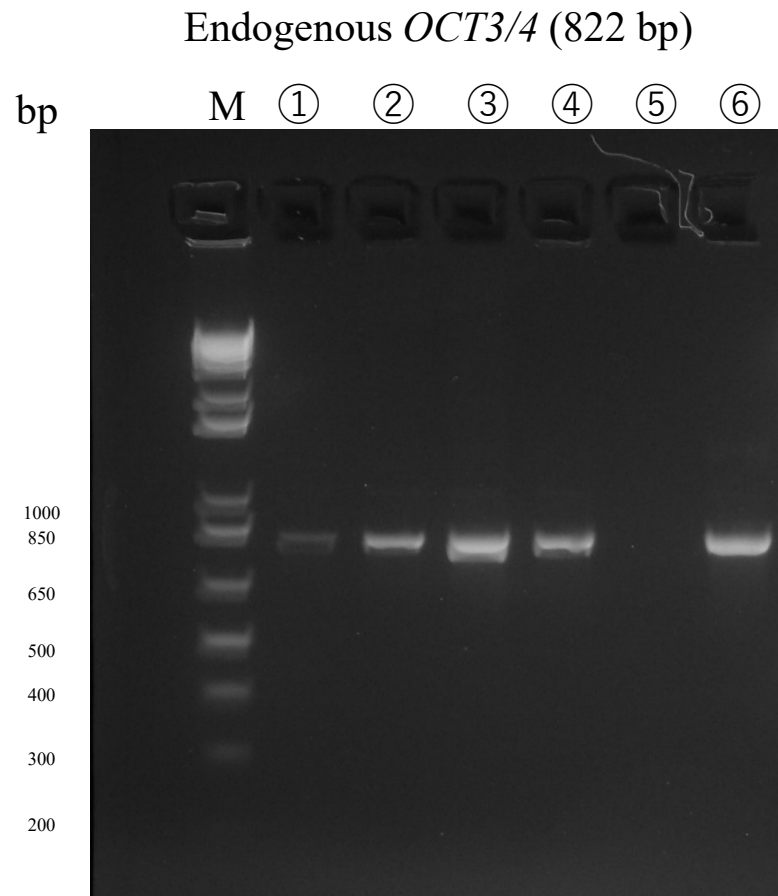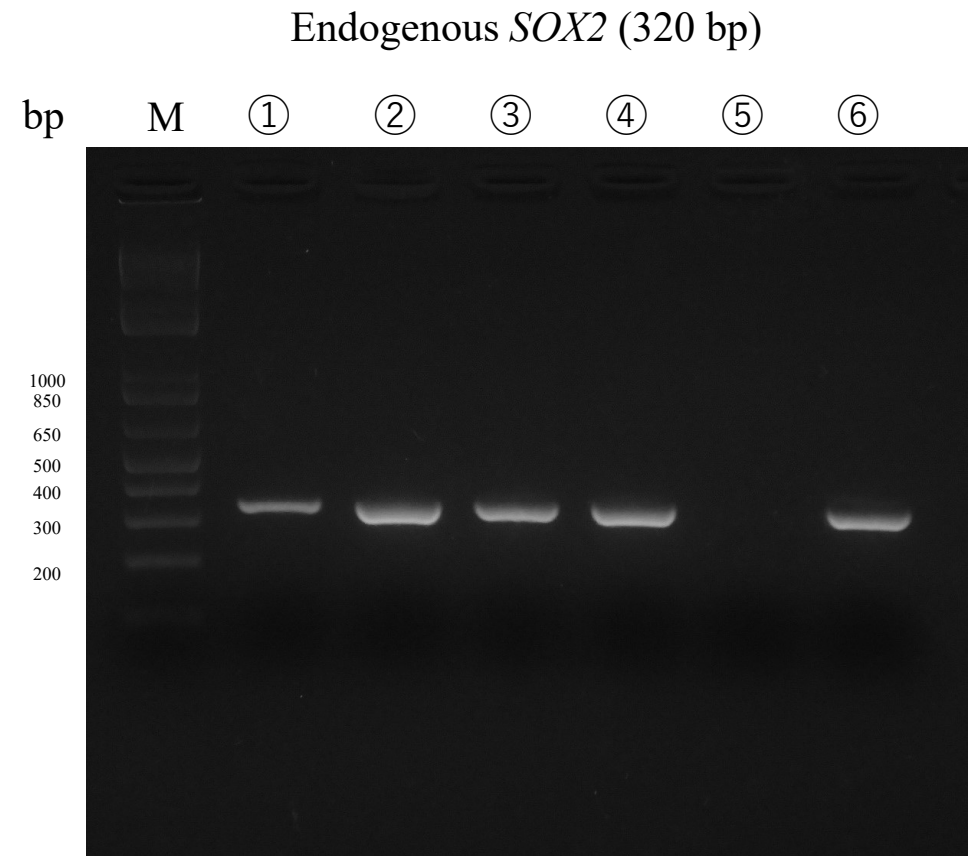

Figure S2

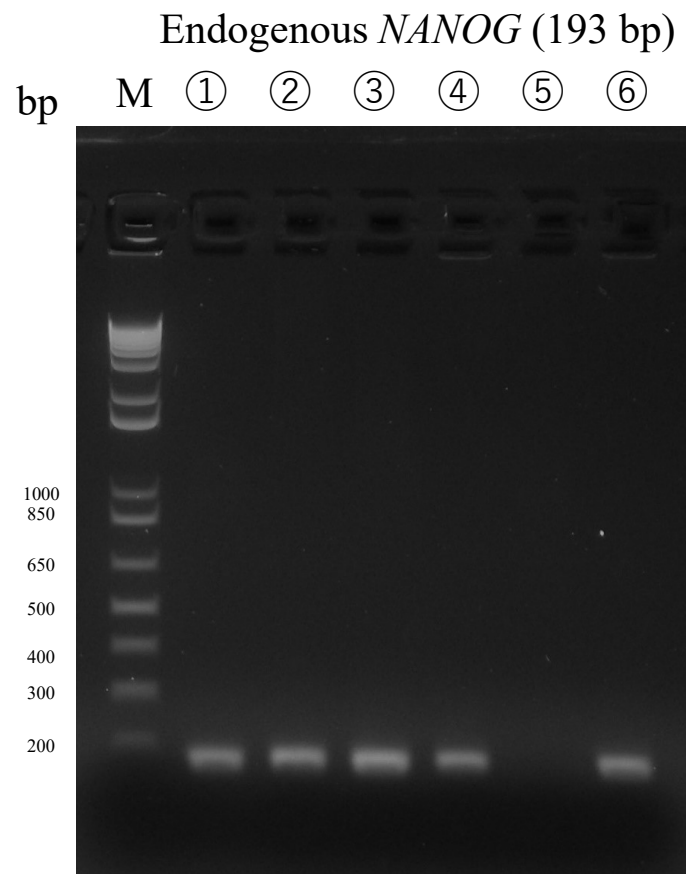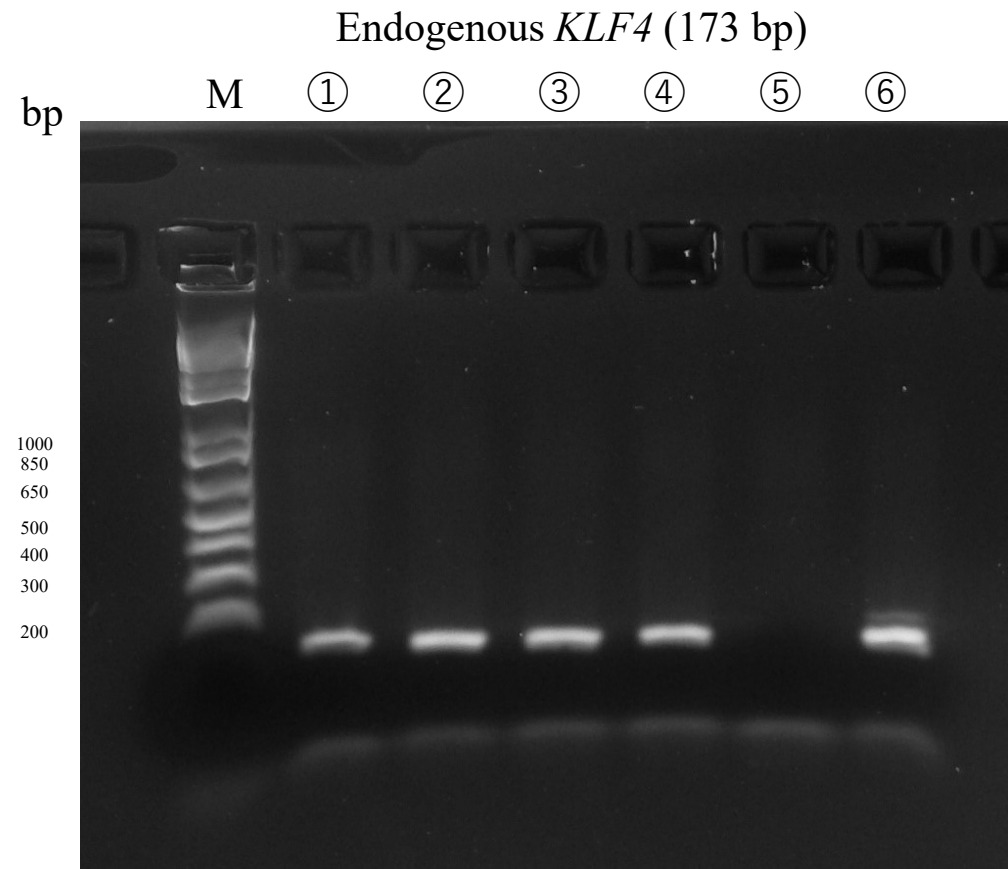

Figure S3

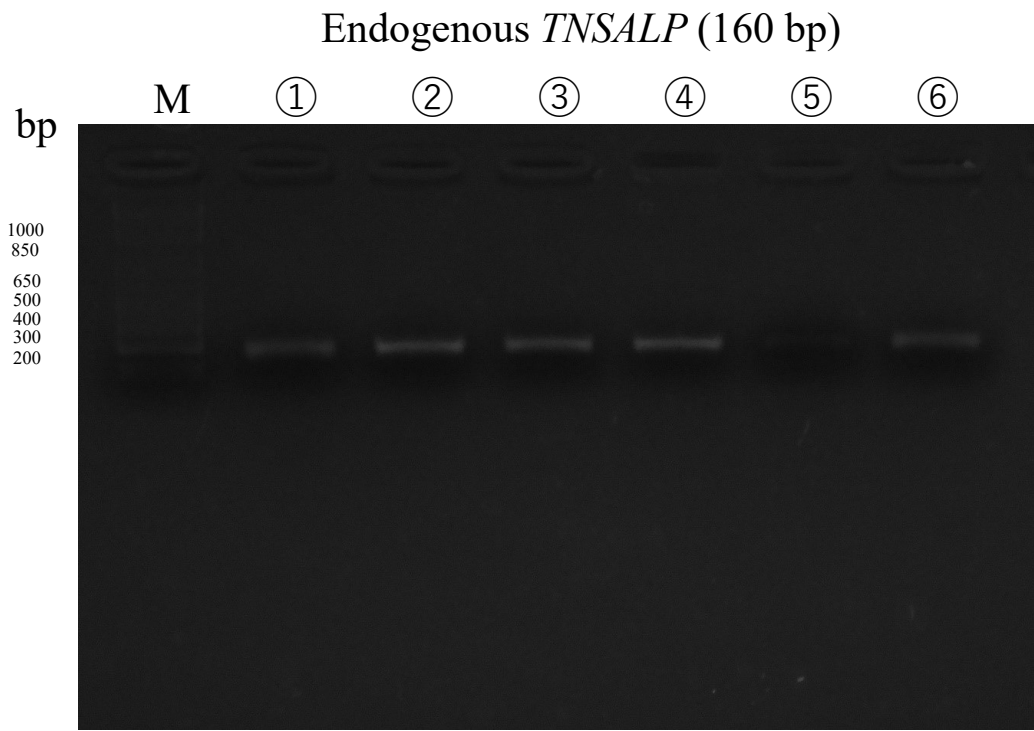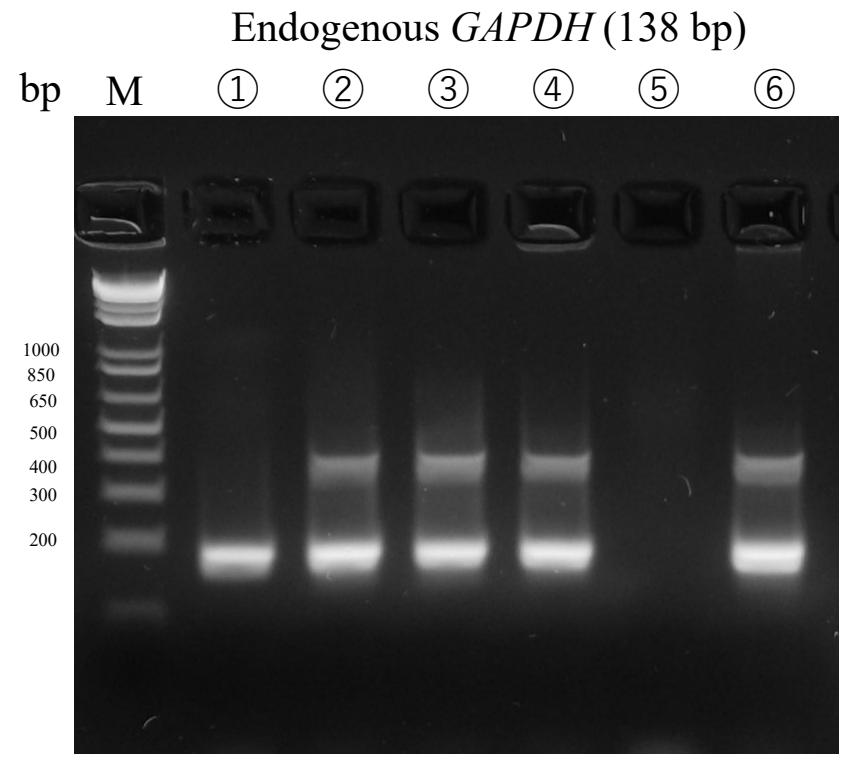

Figure S4

Table S1: Primer sets used for RT-PCR analysis

| Gene          | Forward Primer (5'-3') | Reverse Primer (5'-3') | Product Size (bp) | Reference |
|---------------|------------------------|------------------------|-------------------|-----------|
| <i>OCT3/4</i> | ATTTCACCAGGCCCGGCT     | GCTGATCTGCTGCAGTGTGGGT | 822               | Ref. 11   |
| <i>SOX2</i>   | AGGACCAGCTGGGCTACCCG   | GGCGCCGGGAGATACATGC    | 320               | Ref. 11   |
| <i>NANOG</i>  | TTGGAAGCTGCTGGGGAAG    | GATGGGAGGAGGGAGAGGA    | 193               | Ref. 27   |
| <i>KLF4</i>   | CGTGCTGAAGCGTCGCTGA    | GGGTGCACGAAGAGACCGCC   | 173               | Ref. 28   |
| <i>TNSALP</i> | TGGCCCCATGCTGAGTGACAC  | TGGCGCAGGGGCACAGCAGAC  | 160               | Ref. 29   |
| <i>GAPDH</i>  | GCACCGTCAAGGCTGAGAAC   | TGGTGAAGACGCCAGTGGGA   | 138               | Ref. 27   |
